# Supplementary material for: Improvement of domain-level ortholog clustering by optimizing domain-specific sum-of-pairs score
Source: Springer Nature journal article supplement (doi:10.1186/1471-2105-15-148), 2014-05-17

# A Gene-level clustering      Domain-level clustering

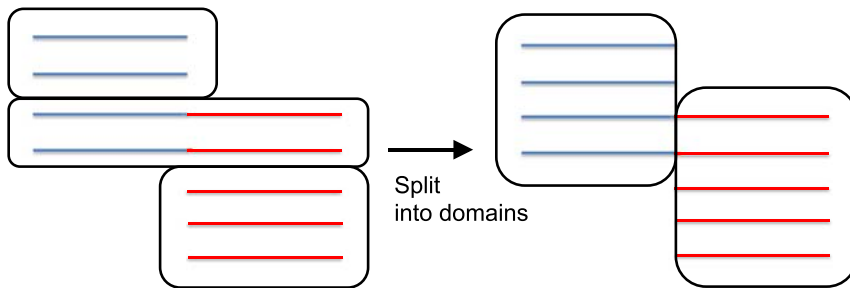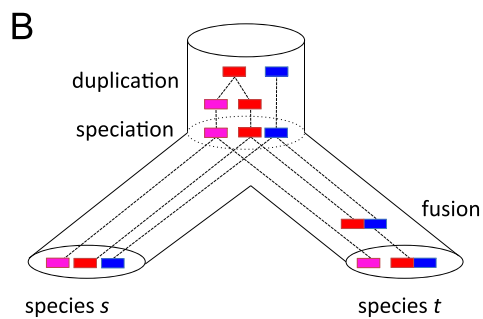

|           | $G_1$ | $G_2$ | $G_3$ |
|-----------|-------|-------|-------|
| species s |       |       |       |
| species t |       |       |       |

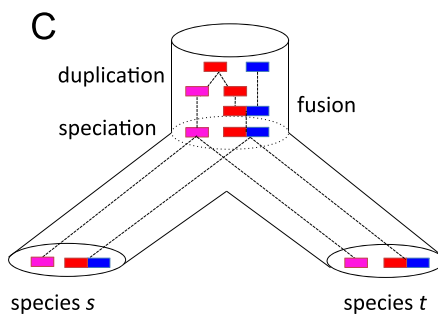

|           | $G_1$ | $G_{2-3}$ |
|-----------|-------|-----------|
| species s |       |           |
| species t |       |           |

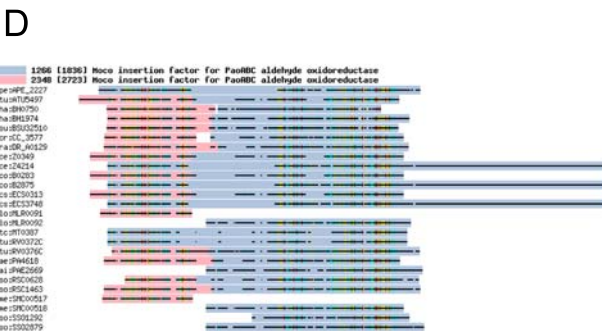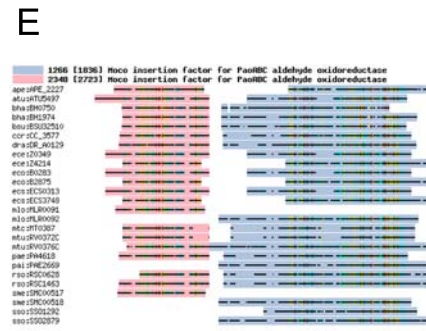

Supplement: 12859_2013_6407_MOESM2_ESM.pdf [file 12859_2013_6407_MOESM2_ESM.pdf]
