# Supplementary material for: Improvement of domain-level ortholog clustering by optimizing domain-specific sum-of-pairs score
Source: Springer Nature journal article supplement (doi:10.1186/1471-2105-15-148), 2014-05-17

**A**

|        |    |
|--------|----|
| [2134] | 20 |
| [3291] | 11 |
|        | 23 |

Cac:CAC3503(0)  
 Lia:L161121(0)  
 Nlo:nl11415(0)  
 Nlo:nl11975(0)  
 Nlo:nl12153(0)  
 NtC:NT0147(1,2)  
 NtC:NT3828(1,2)  
 Ntu:Rv0139(1,2)  
 Ntu:Rv3725(1,2)  
 Nos:al15295(1,2)  
 Nos:al14268(1,2)  
 Pae:PA4631(1,2)  
 Rso:RSp1636(0)  
 Sau:SA0317(0)  
 Sce:YDR541c(0)  
 Sce:YGL039w(0)  
 Sce:YGL157w(0)  
 Sce:YLL056c(0)  
 Sce:YVL151w(0)  
 Spo:SPAC513\_07(0)  
 Spo:SPBC1773\_04(0)  
 Spo:SPBC249\_02(0)  
 Syn:slr1706(1,2)

**TOTAL SCORE: 26060**

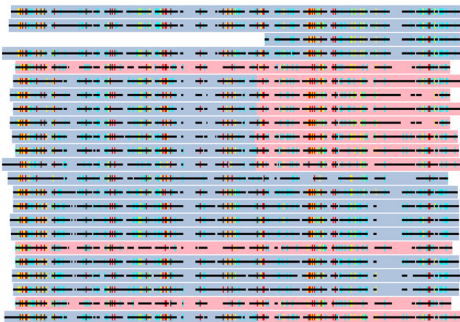

**B**

|        |    |
|--------|----|
| [1863] | 12 |
| [2842] | 7  |
|        | 15 |

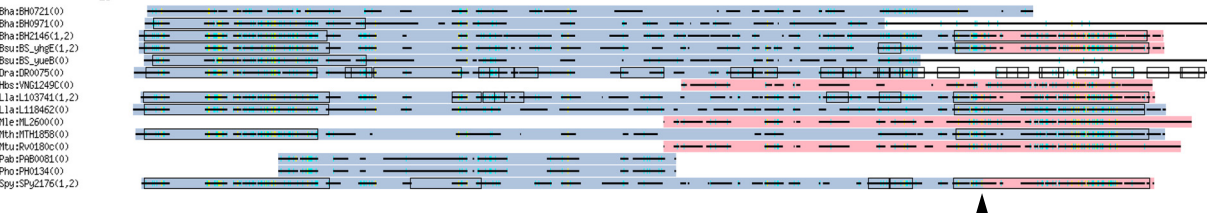

*move\_boundary*

|        |    |
|--------|----|
| [1863] | 12 |
| [2842] | 7  |
|        | 15 |

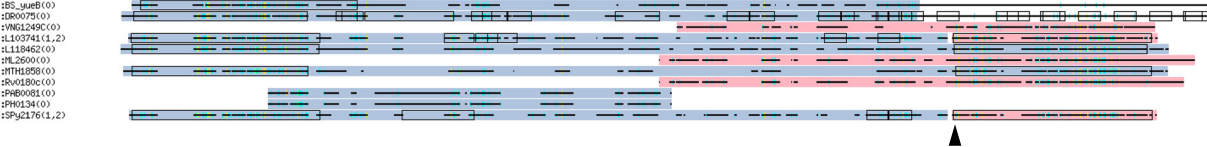

*create\_boundary*

|        |    |
|--------|----|
| [1863] | 12 |
| [2842] | 9  |
|        | 15 |

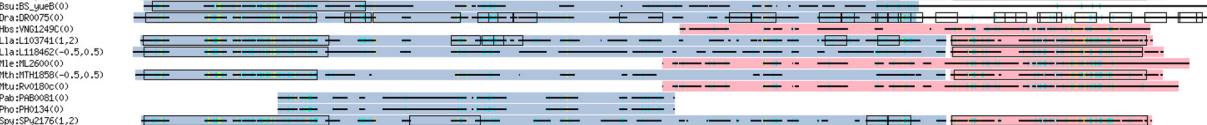

Supplement: 12859_2013_6407_MOESM4_ESM.pdf [file 12859_2013_6407_MOESM4_ESM.pdf]
