# Supplementary material for: Improvement of domain-level ortholog clustering by optimizing domain-specific sum-of-pairs score
Source: Springer Nature journal article supplement (doi:10.1186/1471-2105-15-148), 2014-05-17

**A**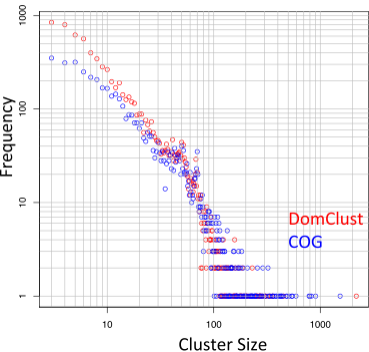**B**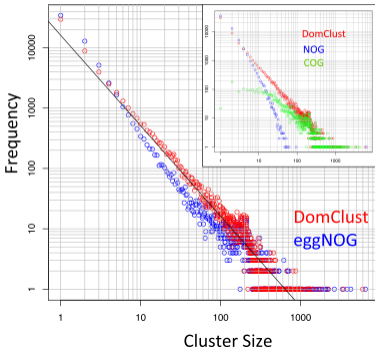

Supplement: 12859_2013_6407_MOESM5_ESM.pdf [file 12859_2013_6407_MOESM5_ESM.pdf]
